# Supplementary material for: Response of a Zn(ii)-based metal–organic coordination polymer towards trivalent metal ions (Al3+, Fe3+ and Cr3+) probed by spectroscopic methods
Source: Royal Society of Chemistry journal article supplement (doi:10.1039/d1dt00729g), 2021-01-01
Supplement: d1dt00729g1.pdf [file d1dt00729g1.pdf]

## **Response of a Zn(II)-based Metal-Organic Coordination Polymer towards Trivalent Metal Ions ( $\text{Al}^{3+}$ , $\text{Fe}^{3+}$ , $\text{Cr}^{3+}$ ) Probed by Spectroscopic Approaches**

Pooja Daga,<sup>a</sup> Priyanka Manna,<sup>b</sup> Prakash Majee,<sup>a</sup> Debal Kanti Singha,<sup>a,b</sup> Sayani Hui,<sup>b</sup> Ananta Kumar Ghosh,<sup>c</sup> Partha Mahata<sup>b\*</sup> and Sudip Kumar Mondal<sup>a\*</sup>

<sup>a</sup>Department of Chemistry, Siksha-Bhavana, Visva-Bharati University, Santiniketan-731235, West Bengal, India. Email: [sudip.mondal@visva-bharati.ac.in](mailto:sudip.mondal@visva-bharati.ac.in)

<sup>b</sup>Department of Chemistry, Jadavpur University, Jadavpur, Kolkata-700 032, West Bengal, India. Email: [parthachem@gmail.com](mailto:parthachem@gmail.com)

<sup>c</sup>Department of Chemistry, Burdwan Raj College, Burdwan, Burdwan-713104, West Bengal, India

### **ELECTRONIC SUPPLEMENTARY INFORMATION**

---

\* Corresponding Authors, E-mail: [sudip.mondal@visva-bharati.ac.in](mailto:sudip.mondal@visva-bharati.ac.in), [parthachem@gmail.com](mailto:parthachem@gmail.com)

**Table S1.** Selected bond distances (Å) observed in [Zn(5-AIP)(Ald-4)]·H<sub>2</sub>O, **1**

| Bond         | Distances, Å | Bond         | Distances, Å |
|--------------|--------------|--------------|--------------|
| Zn(1)-O(2)   | 1.945(2)     | Zn(1)-N(1)   | 2.047(3)     |
| Zn(1)-O(3)#1 | 1.982(2)     | Zn(1)-N(3)#2 | 2.099(3)     |

Symmetry transformations used to generate equivalent atoms: #1  $x, -y+5/2, z-1/2$  #2  $x, -y+3/2, z-1/2$

**Table S2.** Selected bond angles observed in [Zn(5-AIP)(Ald-4)]·H<sub>2</sub>O, **1**

| Angle             | Amplitude (°) | Angle               | Amplitude (°) |
|-------------------|---------------|---------------------|---------------|
| O(2)-Zn(1)-O(3)#1 | 101.33(10)    | O(2)-Zn(1)-N(3)#2   | 110.39(11)    |
| O(2)-Zn(1)-N(1)   | 105.22(12)    | O(3)#1-Zn(1)-N(3)#2 | 103.36(11)    |
| O(3)#1-Zn(1)-N(1) | 132.26(12)    | N(1)-Zn(1)-N(3)#2   | 103.49(11)    |

Symmetry transformations used to generate equivalent atoms: #1  $x, -y+5/2, z-1/2$  #2  $x, -y+3/2, z-1/2$

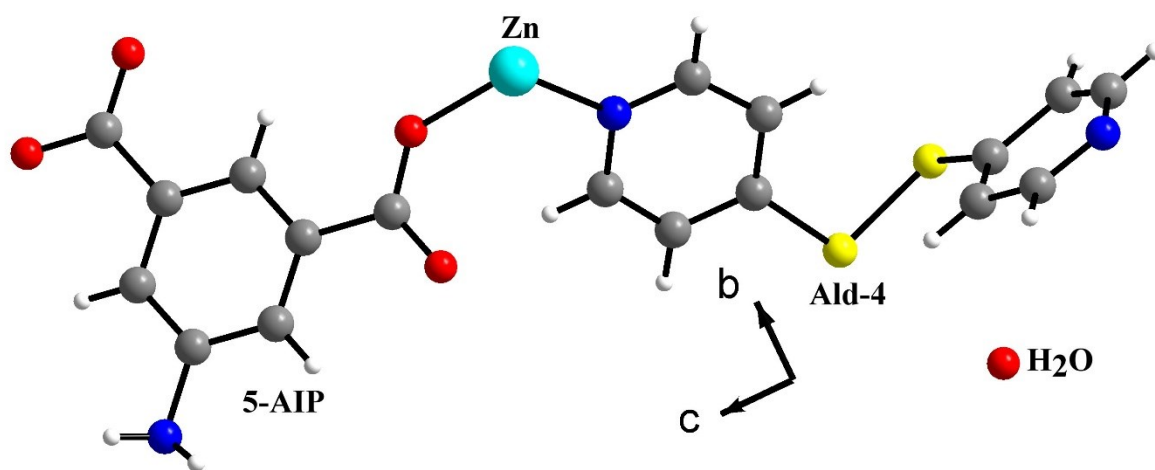

**Fig. S1** Figure shows asymmetric unit in the structure of  $[Zn(5-AIP)(Ald-4)] \cdot H_2O$ , **1**.

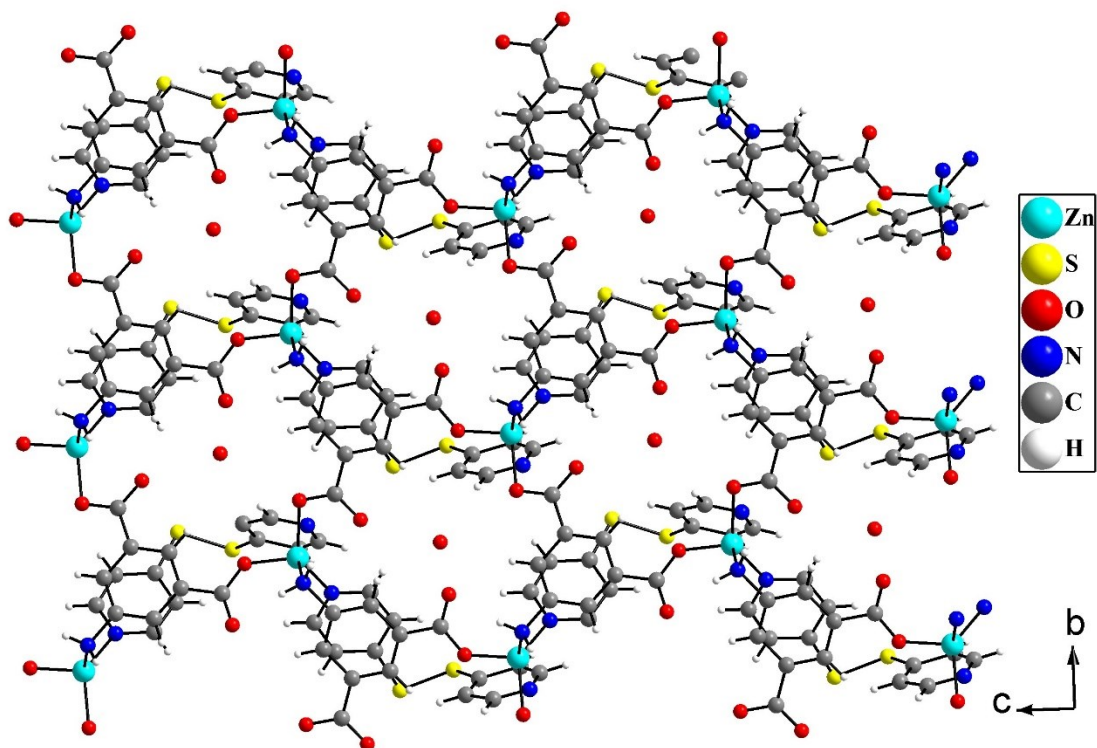

**Fig. S2** Figure shows two-dimensional connectivity between Zn<sup>2+</sup> ions and 5-AIP ligands in *bc* plane along with pendant Ald-4 ligands in [Zn(5-AIP)(Ald-4)]·H<sub>2</sub>O, **1**.

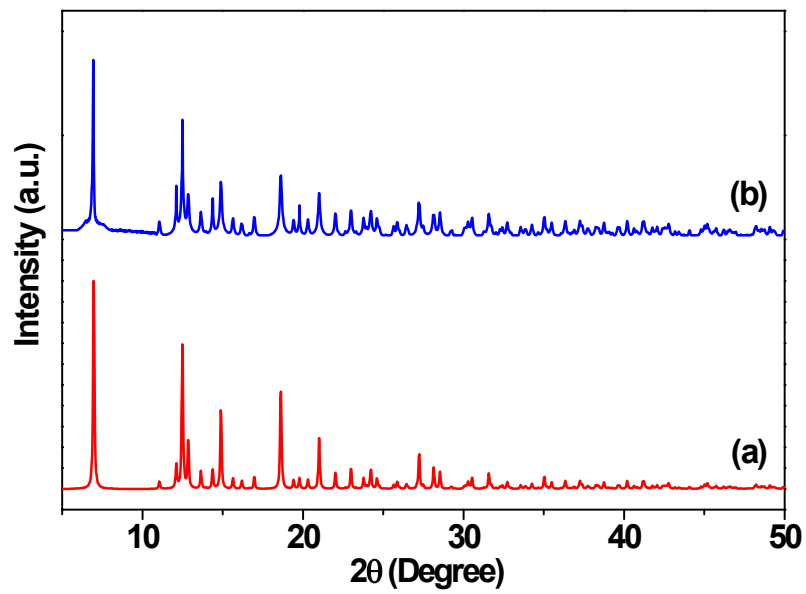

**Fig. S3** Powder XRD (Cu  $K\alpha$ ) patterns of **1**: (a) simulated from single-crystal X-ray data, (b) experimental.

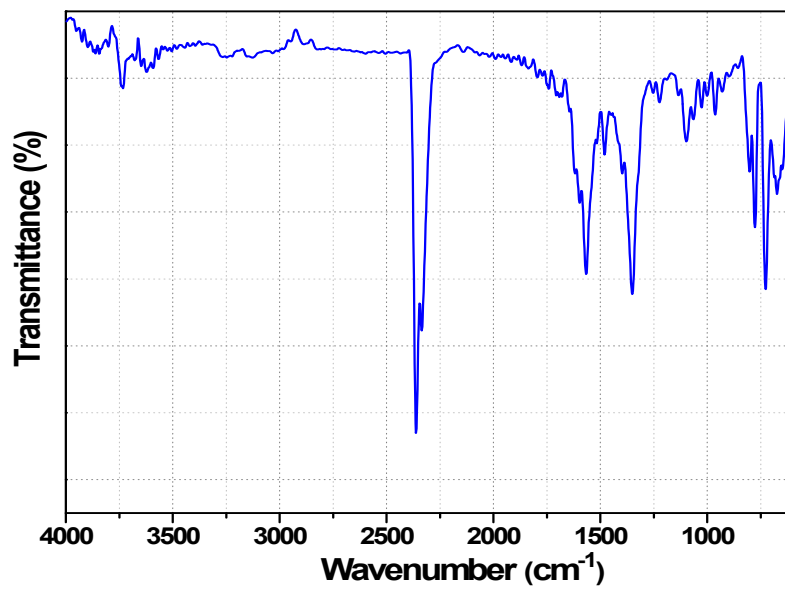

Fig. S4 FTIR spectrum of 1.

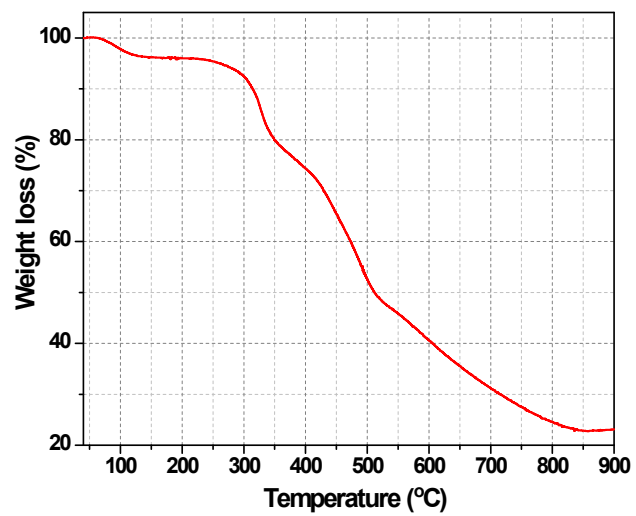

**Fig. S5** Thermogravimetric analysis (TGA) data of **1** in a nitrogen atmosphere. The plot shows % weight loss of **1** with the increase in temperature.

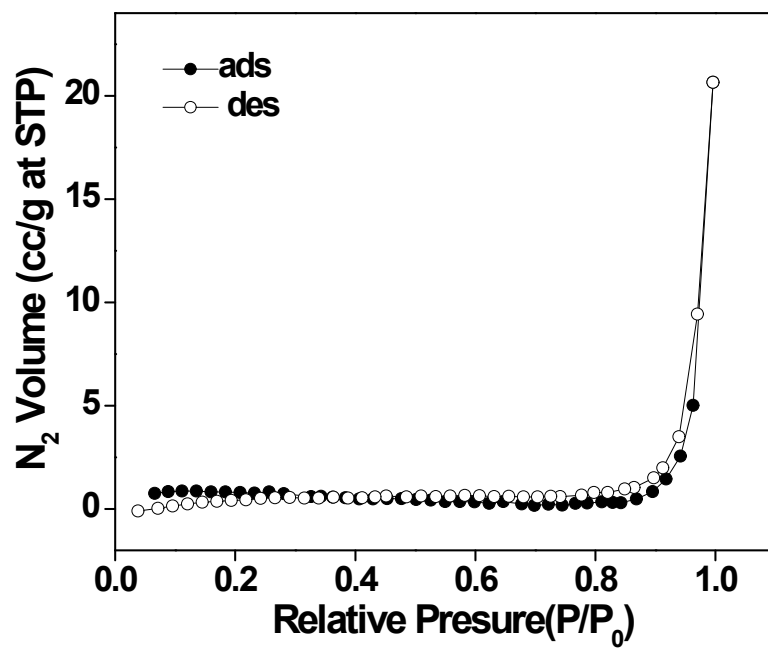

Fig. S6  $N_2$  sorption isotherm of 1.



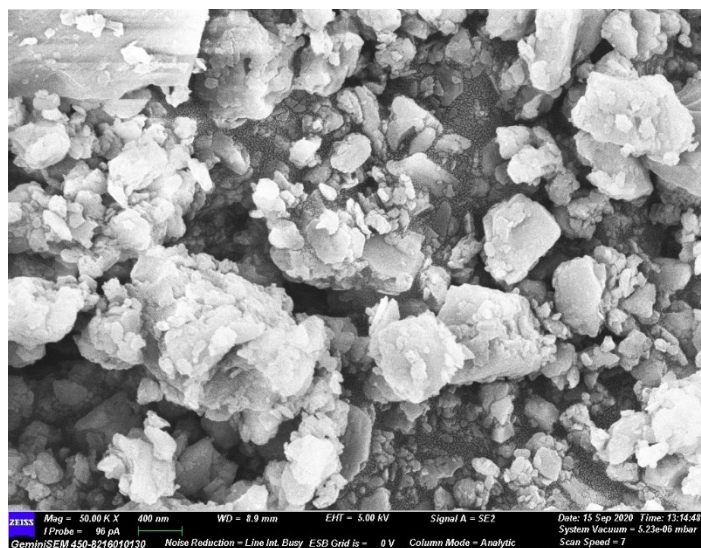

**Fig. S7** SEM image of 1.

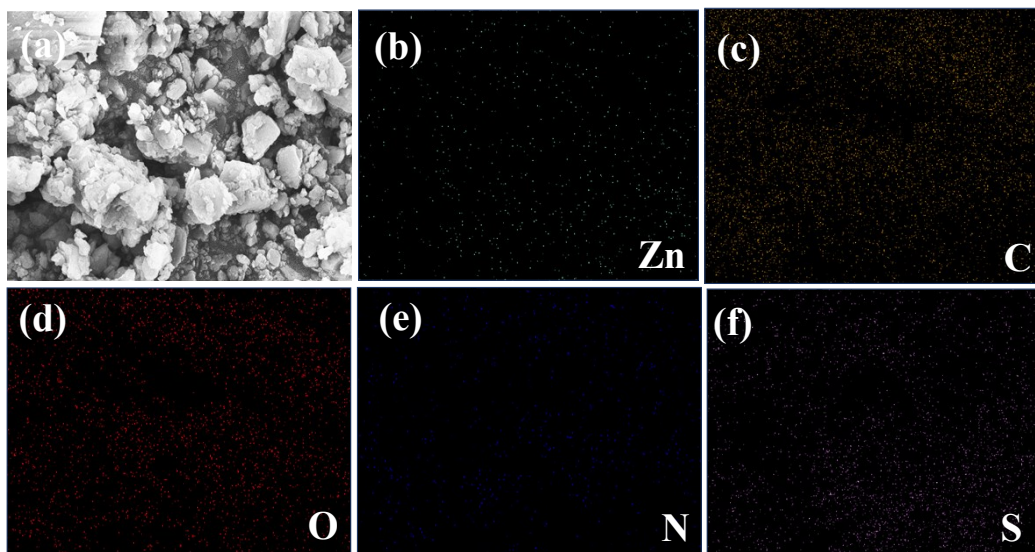

**Fig. S8** SEM image in which elemental mapping is performed in **1** and elemental mapping images, (b) Zn K, (c) C K, (d) O K (e) N K and (f) S K.

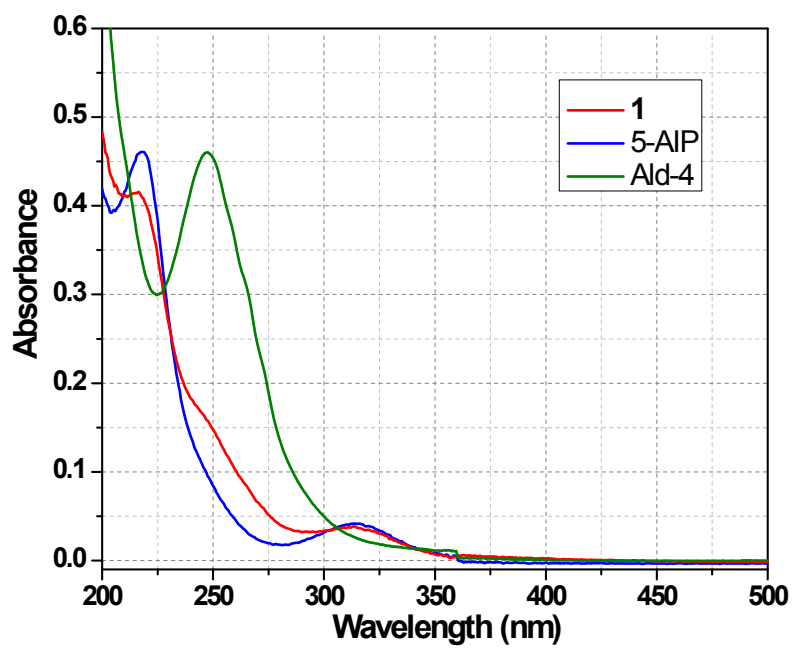

Fig. S9 UV-Visible absorption spectra of 1, 5-AIP and Ald-4.

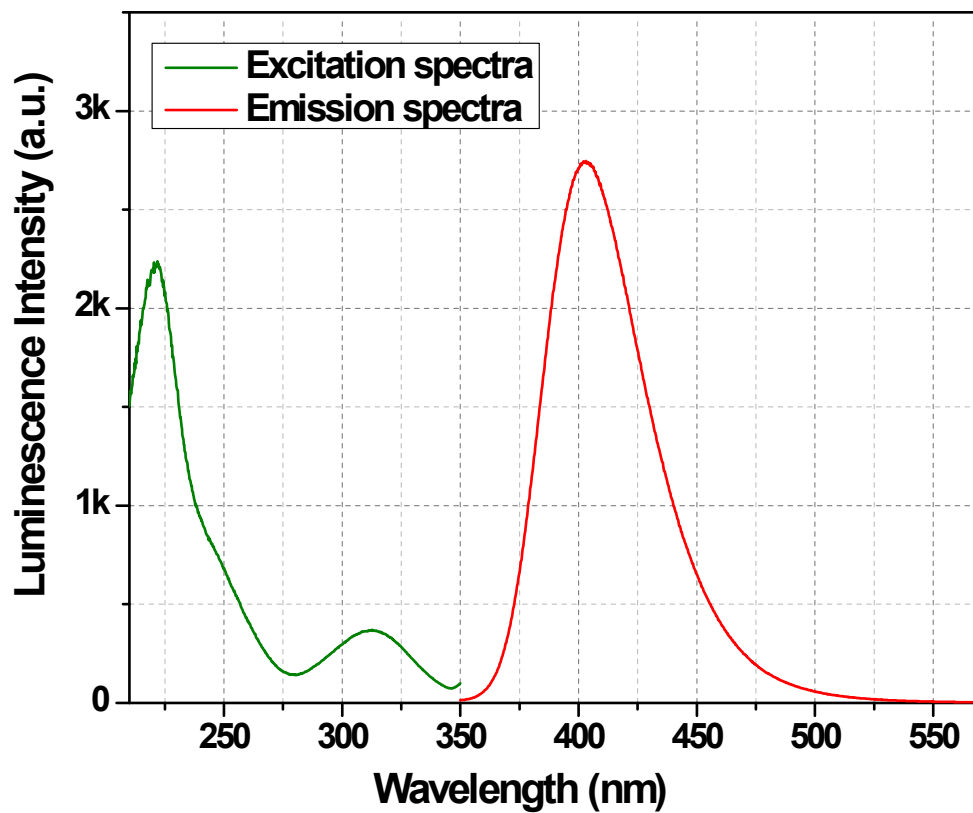

**Fig. S10** Excitation and emission spectra of **1**. The excitation wavelength was chosen at 300 nm for emission spectra and for the excitation spectra, emission was fixed at 403 nm.

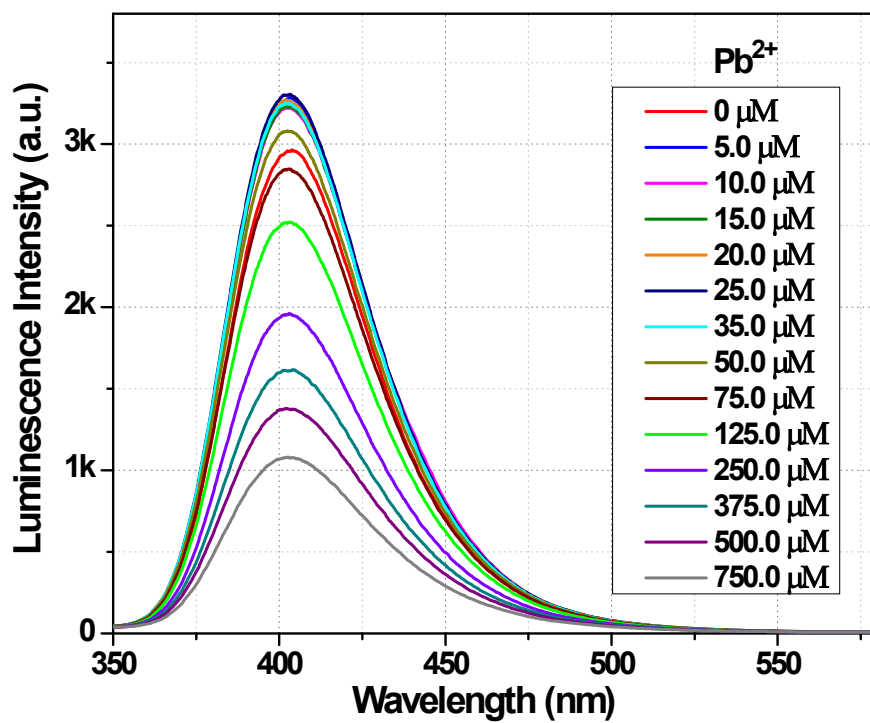

**Fig. S11** Emission spectra of **1** dispersed in water upon incremental addition of Pb<sup>2+</sup> solution ( $\lambda_{\text{ex}} = 300$  nm). The final concentration of Pb<sup>2+</sup> in the medium is indicated in the legend.

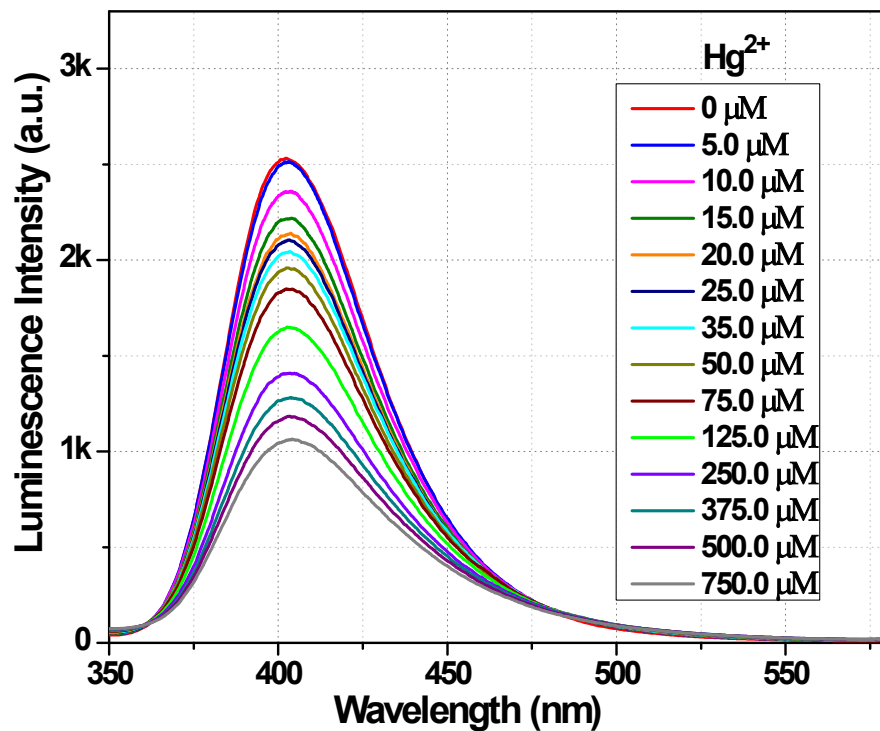

**Fig. S12** Emission spectra of **1** dispersed in water upon incremental addition of Hg<sup>2+</sup> solution ( $\lambda_{\text{ex}} = 300$  nm). The final concentration of Hg<sup>2+</sup> in the medium is indicated in the legend.

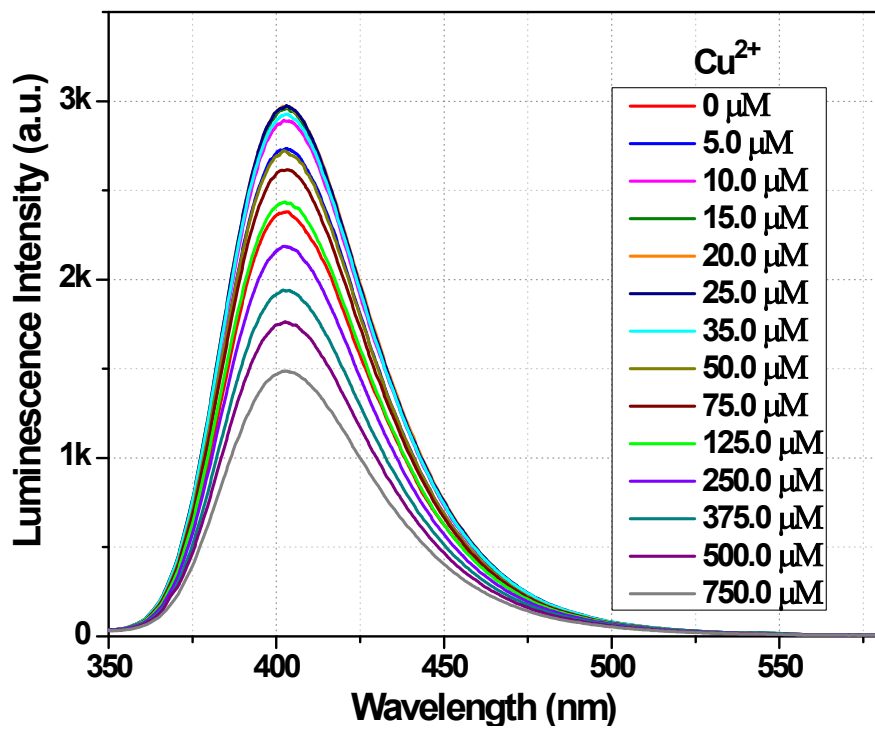

**Fig. S13** Emission spectra of **1** dispersed in water upon incremental addition of Cu<sup>2+</sup> solution ( $\lambda_{\text{ex}} = 300$  nm). The final concentration of Cu<sup>2+</sup> in the medium is indicated in the legend.

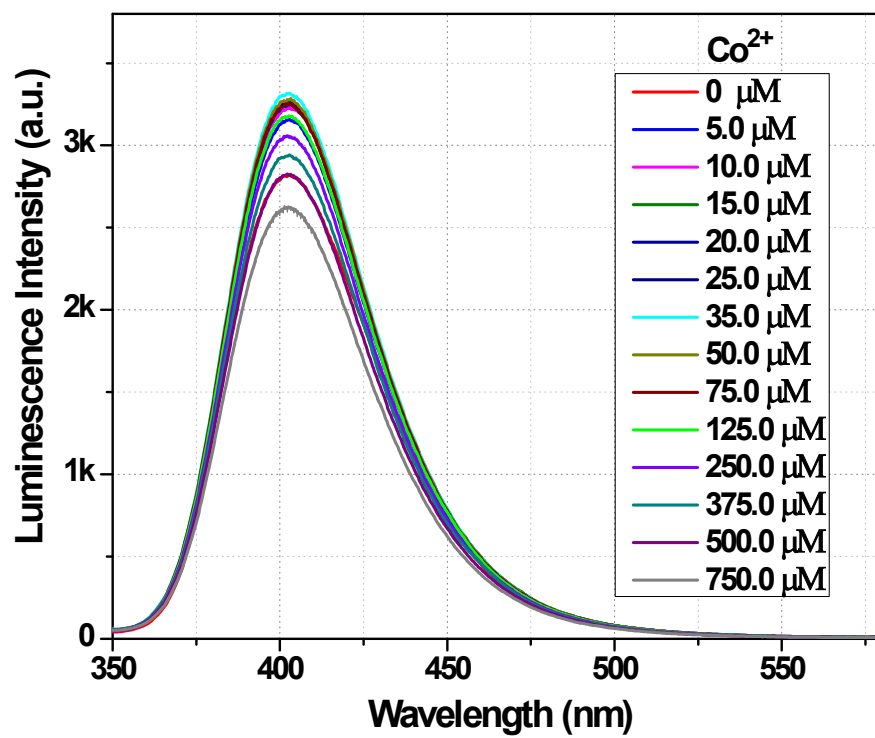

**Fig. S14** Emission spectra of **1** dispersed in water upon incremental addition of  $\text{Co}^{2+}$  solution ( $\lambda_{\text{ex}} = 300$  nm). The final concentration of  $\text{Co}^{2+}$  in the medium is indicated in the legend.



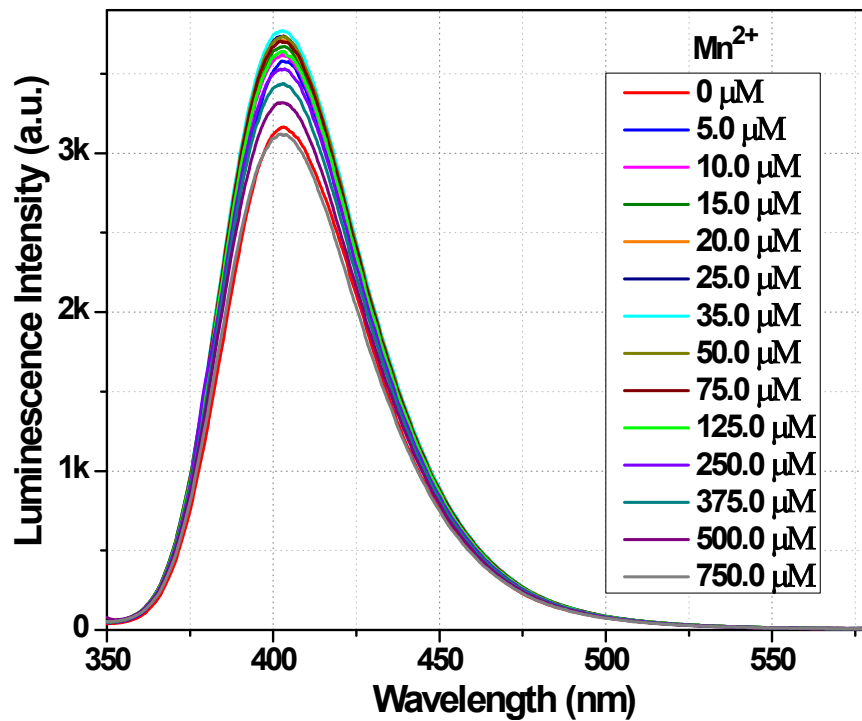

**Fig. S15** Emission spectra of **1** dispersed in water upon incremental addition of Mn<sup>2+</sup> solution ( $\lambda_{\text{ex}} = 300$  nm). The final concentration of Mn<sup>2+</sup> in the medium is indicated in the legend.

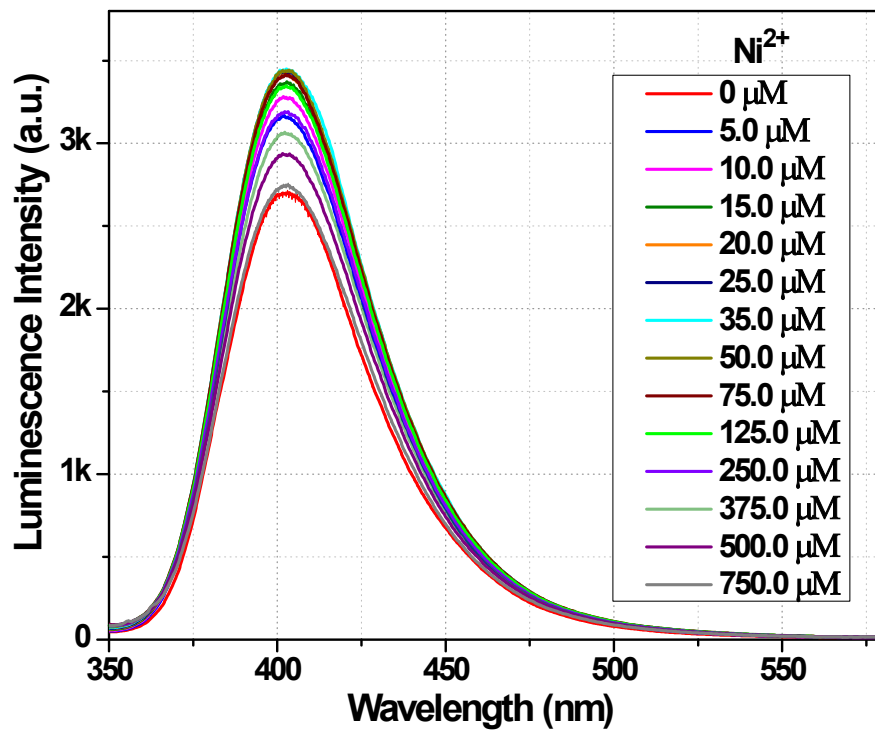

**Fig. S16** Emission spectra of **1** dispersed in water upon incremental addition of Ni<sup>2+</sup> solution ( $\lambda_{\text{ex}} = 300$  nm). The final concentration of Ni<sup>2+</sup> in the medium is indicated in the legend.

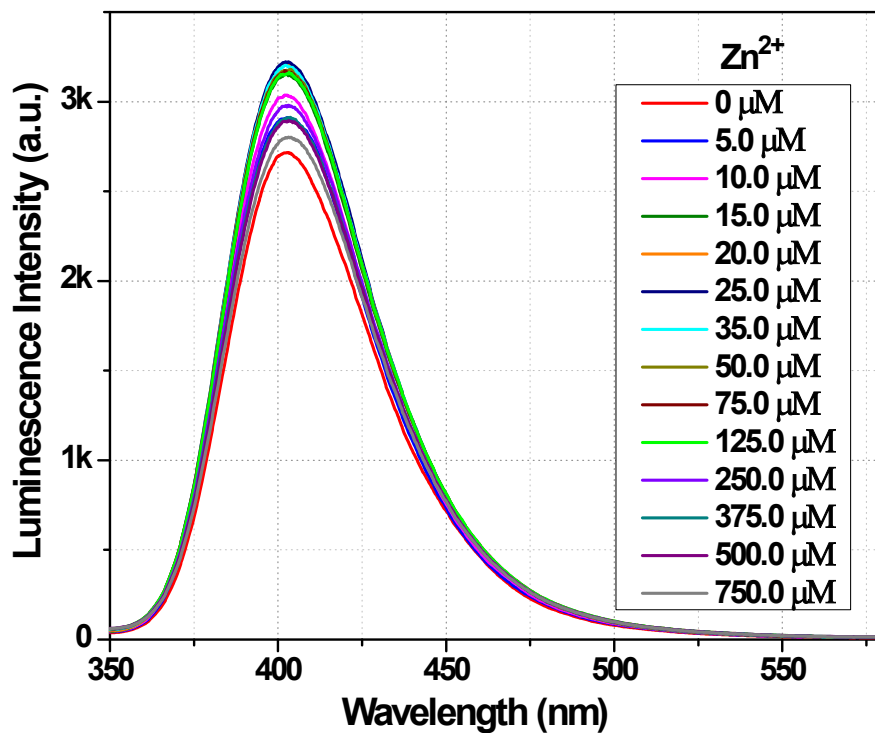

**Fig. S17** Emission spectra of **1** dispersed in water upon incremental addition of Zn<sup>2+</sup> solution ( $\lambda_{\text{ex}} = 300$  nm). The final concentration of Zn<sup>2+</sup> in the medium is indicated in the legend.

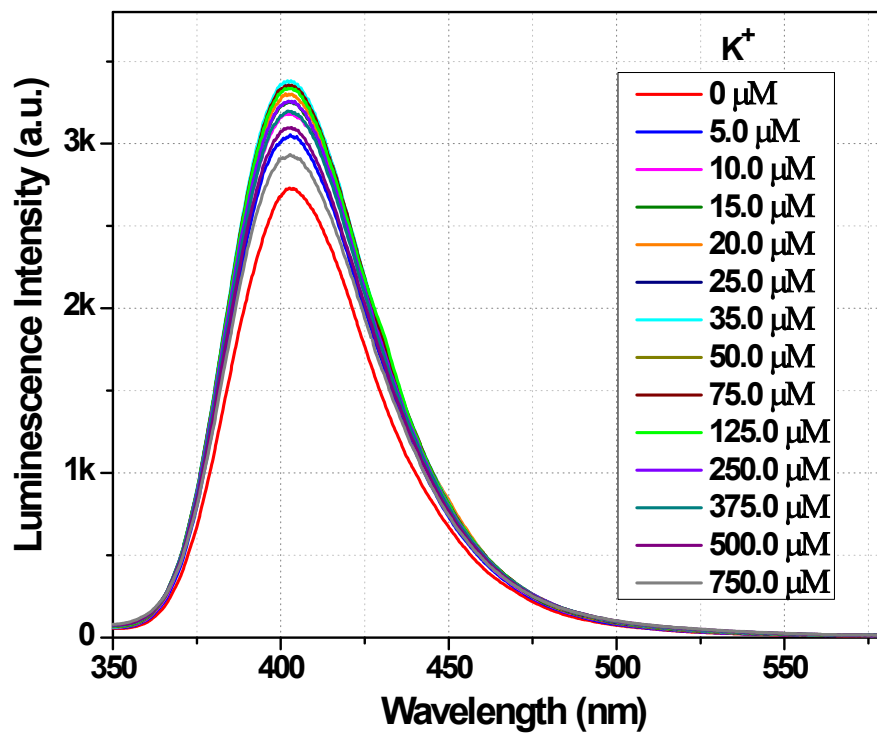

**Fig. S18** Emission spectra of **1** dispersed in water upon incremental addition of K<sup>+</sup> solution ( $\lambda_{\text{ex}} = 300$  nm). The final concentration of K<sup>+</sup> in the medium is indicated in the legend.

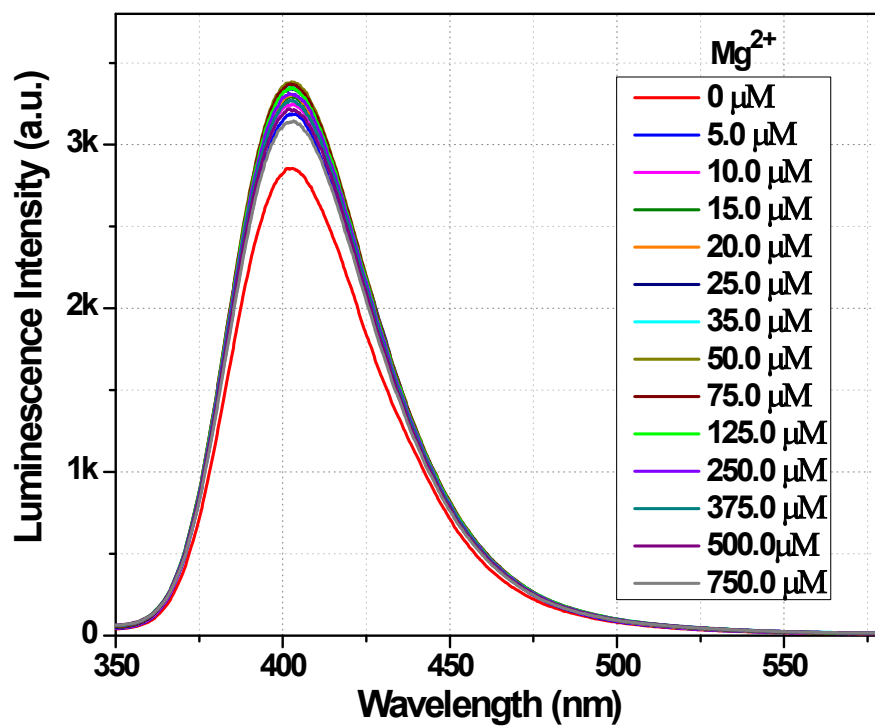

**Fig. S19** Emission spectra of **1** dispersed in water upon incremental addition of Mg<sup>2+</sup> solution ( $\lambda_{\text{ex}} = 300$  nm). The final concentration of Mg<sup>2+</sup> in the medium is indicated in the legend.

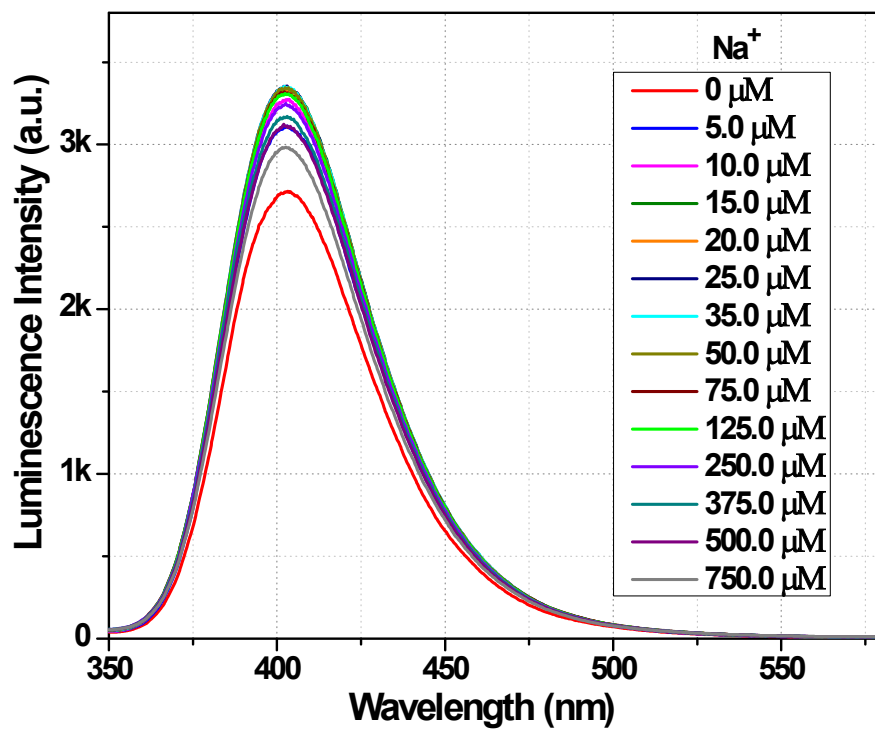

**Fig. S20** Emission spectra of **1** dispersed in water upon incremental addition of Na<sup>+</sup> solution ( $\lambda_{\text{ex}} = 300$  nm). The final concentration of Na<sup>+</sup> in the medium is indicated in the legend.

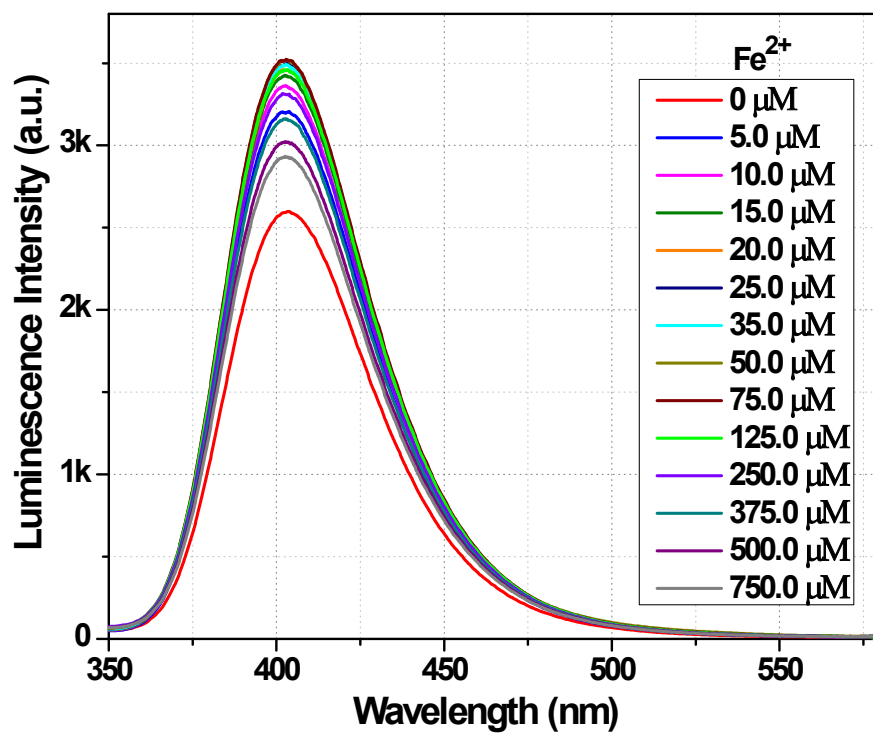

Fig. S21 Emission spectra of **1** dispersed in water upon incremental addition of Fe<sup>2+</sup> solution ( $\lambda_{\text{ex}} = 300$  nm). The final concentration of Fe<sup>2+</sup> in the medium is indicated in the legend.

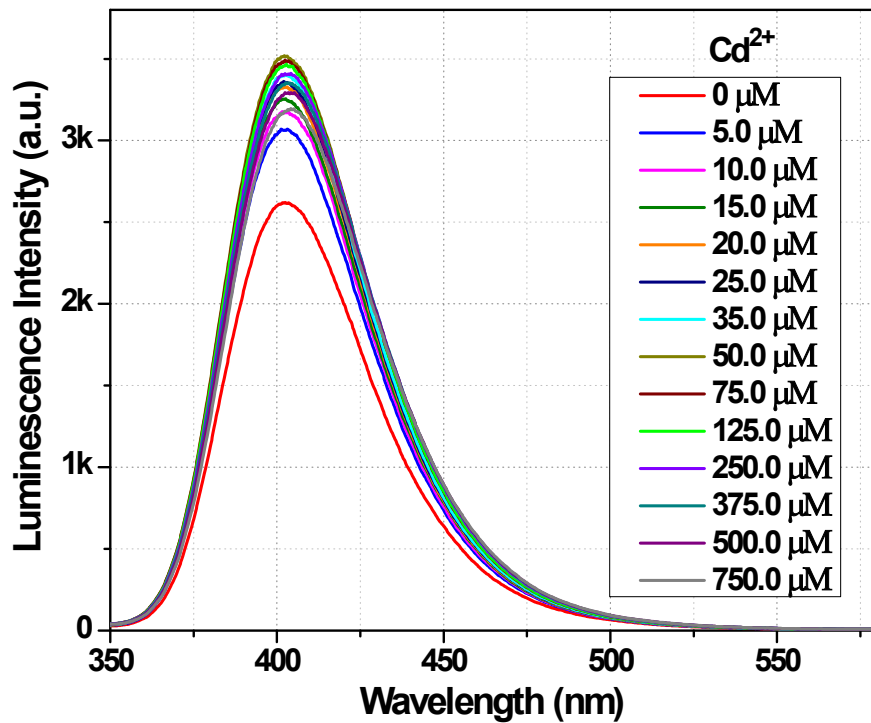

**Fig. S22** Emission spectra of **1** dispersed in water upon incremental addition of Cd<sup>2+</sup> solution ( $\lambda_{\text{ex}} = 300$  nm). The final concentration of Cd<sup>2+</sup> in the medium is indicated in the legend.



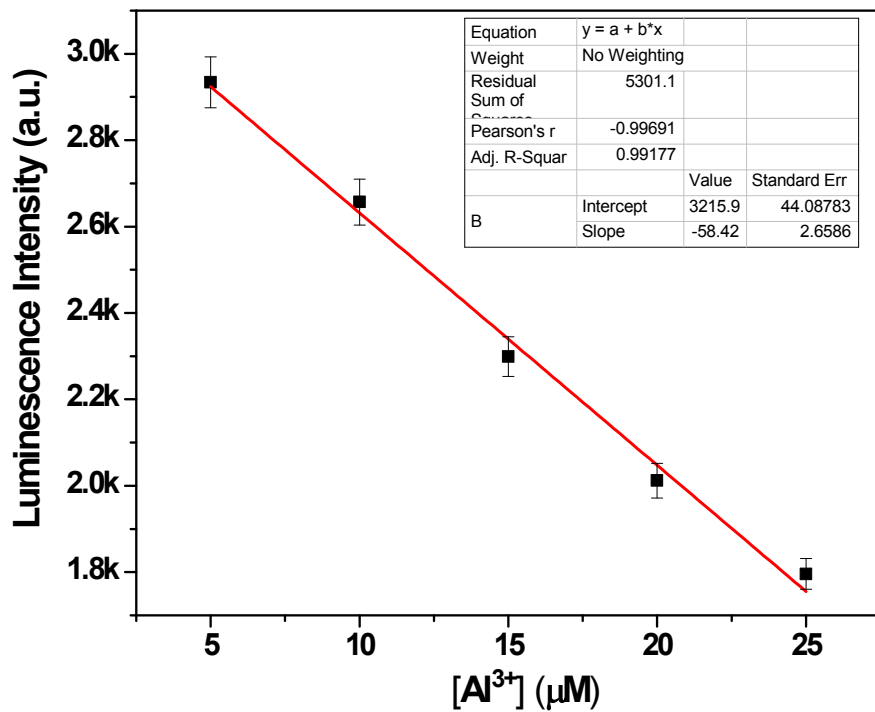

**Fig. S23** The plot of the luminescence intensity of **1** as a function of concentration of  $\text{Al}^{3+}$  ion. The black square points represent the data points with error bars from experiment and the red line is the linear fitted line to the data points.

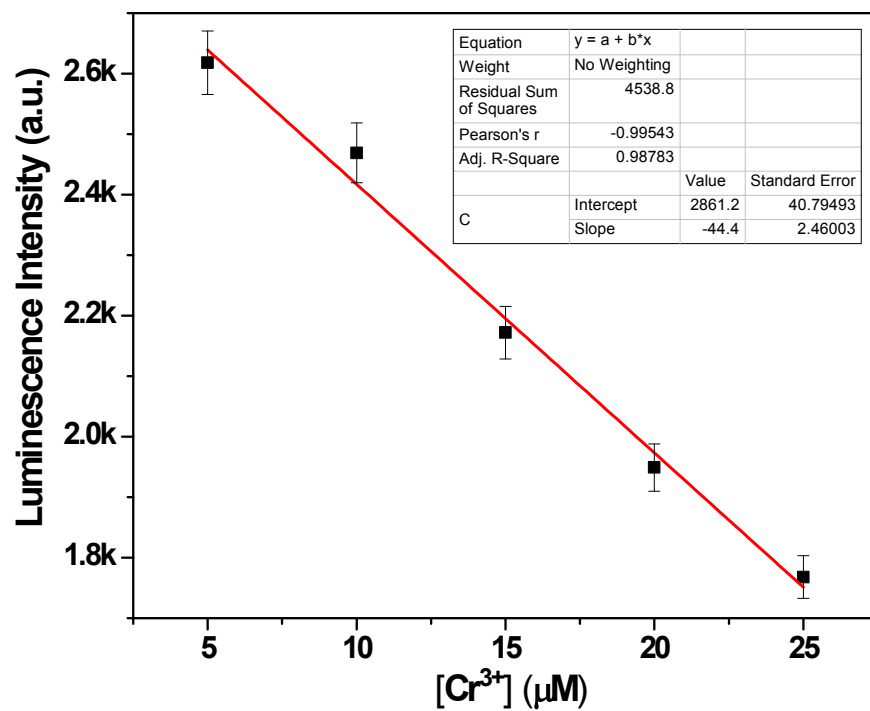

**Fig. S24** The plot of the luminescence intensity of **1** as a function of concentration of  $\text{Cr}^{3+}$  ion. The black square points represent the data points with error bars from experiment and the red line is the linear fitted line to the data points.

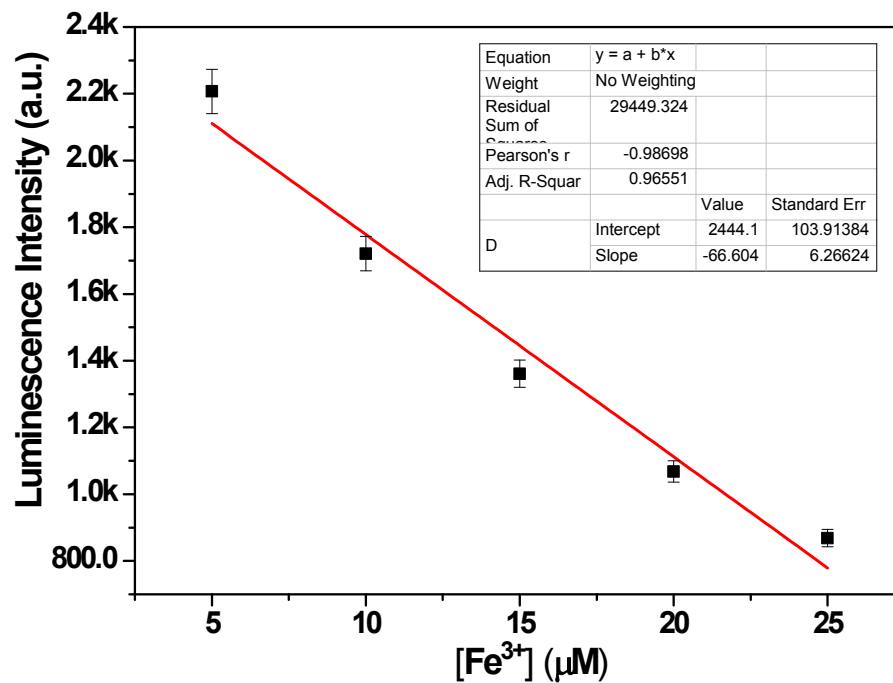

**Fig. S25** The plot of the luminescence intensity of **1** as a function of concentration of  $\text{Fe}^{3+}$  ion. The black square points represent the data points with error bars from experiment and the red line is the linear fitted line to the data points.

**Table S3. Calculation of Standard Deviation and Limit of Detection (LOD) for Al<sup>3+</sup>, Cr<sup>3+</sup> and Fe<sup>3+</sup>:**

| Blank Reading (only 1) | Fluorescence Intensities at 421 nm ( $\bar{X}$ ) | Mean ( $\bar{x}$ ) | Standard Deviation ( $\sigma$ ) =<br>$\sqrt{\frac{\sum  X - \bar{x} ^2}{N}}$ |
|------------------------|--------------------------------------------------|--------------------|------------------------------------------------------------------------------|
| Reading 1              | 3545                                             | 3534.2             | 6.852                                                                        |
| Reading 2              | 3527                                             |                    |                                                                              |
| Reading 3              | 3528                                             |                    |                                                                              |
| Reading 4              | 3532                                             |                    |                                                                              |
| Reading 5              | 3539                                             |                    |                                                                              |

Slope,  $m$  for Al<sup>3+</sup> = 58.42

Slope,  $m$  for Cr<sup>3+</sup> = 44.40

Slope,  $m$  for Fe<sup>3+</sup> = 66.60

LOD for Al<sup>3+</sup> =  $3\sigma/m = (3 \times 6.852)/58.42 = 0.35 \mu\text{M} = 8.43 \text{ ppb}$

By repeating the experiment 3 times, the uncertainty have been calculated to be  $\pm 0.007$ . So, the LOD value for Al<sup>3+</sup> =  $0.35 \pm 0.007 \mu\text{M}$ .

LOD for Cr<sup>3+</sup> =  $3\sigma/m = (3 \times 6.852)/44.40 = 0.46 \mu\text{M} = 22.63 \text{ ppb}$

By repeating the experiment 3 times, the uncertainty have been calculated to be  $\pm 0.009$ . So, the LOD value for Cr<sup>3+</sup> =  $0.46 \pm 0.009 \mu\text{M}$ .

LOD for Fe<sup>3+</sup> =  $3\sigma/m = (3 \times 6.852)/66.60 = 0.30 \mu\text{M} = 15.85 \text{ ppb}$

By repeating the experiment 3 times, the uncertainty have been calculated to be  $\pm 0.006$ . So, the LOD value for Fe<sup>3+</sup> =  $0.30 \pm 0.006 \mu\text{M}$ .

where,  $\sigma$  is the standard deviation and  $m$  is the slope of the plot of luminescence intensity vs. concentration of analyte.

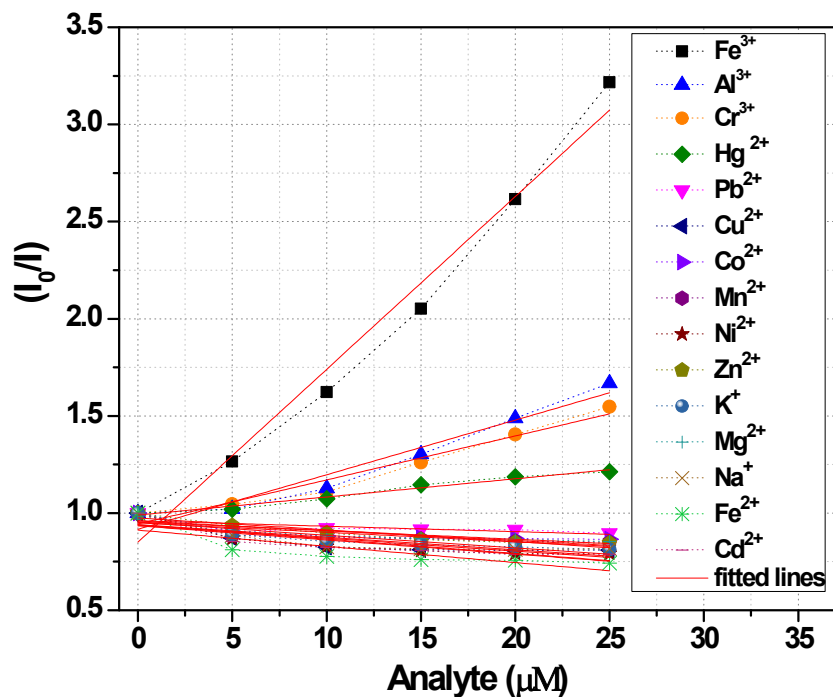

**Fig. S26** The plot of  $(I_0/I)$  of **1** (at 403 nm) vs. concentration of analytes,  $[C]$  (up to 25  $\mu\text{M}$ ).  $I_0$  and  $I$  are the luminescence intensities of **1** in the absence and presence of the analyte, respectively. The solid red lines represent the linear fits to the data.

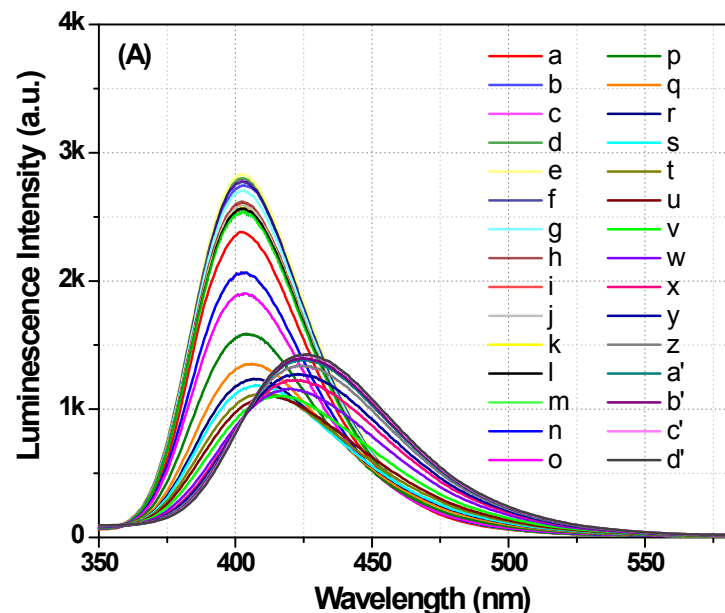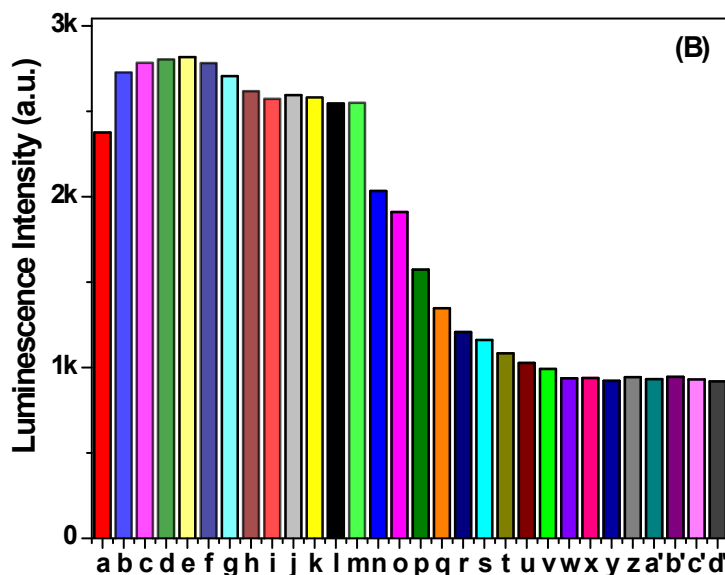

**Fig. S27** (A) Emission spectra of **1** dispersed in aqueous solution upon the cumulative addition of different metal ions followed by stepwise addition of  $\text{Al}^{3+}$  ion ( $\lambda_{\text{ex}} = 300$  nm). (B) Bar diagram showing the luminescence intensity (monitored at 403 nm) after the sequential addition of the other metal ions and  $\text{Al}^{3+}$  ion. The composition and concentration of the system were as follows: (a) **1** in aqueous solution, (b) a + 15  $\mu\text{M}$   $\text{Mg}^{2+}$ , (c) b + 15  $\mu\text{M}$   $\text{K}^+$ , (d) c + 15  $\mu\text{M}$   $\text{Ni}^{2+}$ , (e) d + 15  $\mu\text{M}$   $\text{Na}^+$ , (f) e + 15  $\mu\text{M}$   $\text{Cu}^{2+}$ , (g) f + 15  $\mu\text{M}$   $\text{Hg}^{2+}$ , (h) g + 15  $\mu\text{M}$   $\text{Pb}^{2+}$ , (i) h + 15  $\mu\text{M}$   $\text{Fe}^{2+}$ , (j) i + 15  $\mu\text{M}$   $\text{Cd}^{2+}$ , (k) j + 15  $\mu\text{M}$   $\text{Zn}^{2+}$ , (l) k + 15  $\mu\text{M}$   $\text{Co}^{2+}$  (m) l + 15  $\mu\text{M}$   $\text{Mn}^{2+}$ , (n) m + 10  $\mu\text{M}$   $\text{Al}^{3+}$ , (o) m + 15  $\mu\text{M}$   $\text{Al}^{3+}$ , (p) m + 25  $\mu\text{M}$   $\text{Al}^{3+}$ , (q) m + 35  $\mu\text{M}$   $\text{Al}^{3+}$ , (r) m + 45  $\mu\text{M}$   $\text{Al}^{3+}$ , (s) m + 50  $\mu\text{M}$   $\text{Al}^{3+}$ , (t) m + 62.5  $\mu\text{M}$   $\text{Al}^{3+}$ , (u) m + 75  $\mu\text{M}$   $\text{Al}^{3+}$ , (v) m + 100  $\mu\text{M}$   $\text{Al}^{3+}$ , (w) m + 150  $\mu\text{M}$   $\text{Al}^{3+}$ , (x) m + 200  $\mu\text{M}$   $\text{Al}^{3+}$ , (y) m + 250  $\mu\text{M}$   $\text{Al}^{3+}$ , (z) n + 350  $\mu\text{M}$   $\text{Al}^{3+}$ , (a') n + 450  $\mu\text{M}$   $\text{Al}^{3+}$  and (b') n + 500  $\mu\text{M}$   $\text{Al}^{3+}$  (c') n + 625  $\mu\text{M}$   $\text{Al}^{3+}$  (d') n + 750  $\mu\text{M}$   $\text{Al}^{3+}$ .

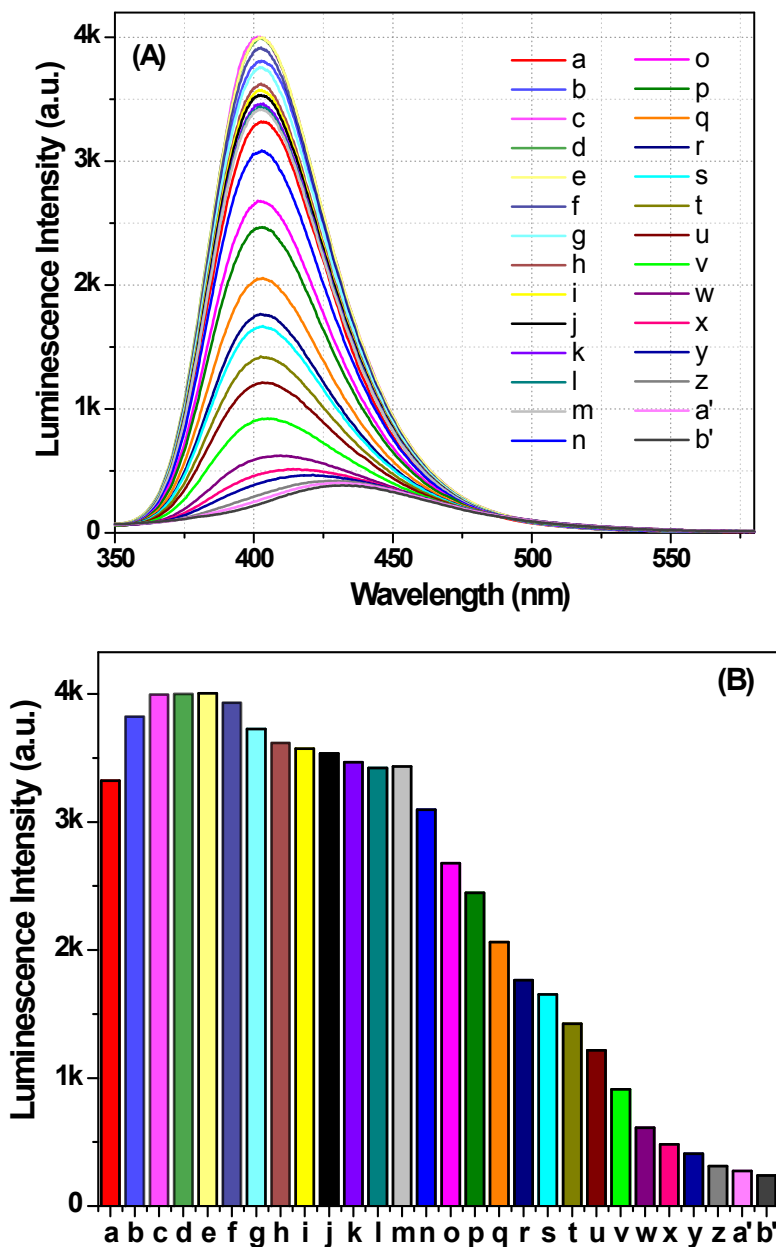

**Fig. S28** (A) Emission spectra of **1** dispersed in aqueous solution upon the cumulative addition of different metal ions followed by stepwise addition of  $\text{Cr}^{3+}$  ion ( $\lambda_{\text{ex}} = 300$  nm). (B) Bar diagram showing the luminescence intensity (monitored at 403 nm) after the sequential addition of the other metal ions and  $\text{Cr}^{3+}$  ion. The composition and concentration of the system were as follows: (a) **1** in aqueous solution, (b) a + 15  $\mu\text{M}$   $\text{Mg}^{2+}$ , (c) b + 15  $\mu\text{M}$   $\text{K}^+$ , (d) c + 15  $\mu\text{M}$   $\text{Ni}^{2+}$ , (e) d + 15  $\mu\text{M}$   $\text{Na}^+$ , (f) e + 15  $\mu\text{M}$   $\text{Cu}^{2+}$ , (g) f + 15  $\mu\text{M}$   $\text{Hg}^{2+}$ , (h) g + 15  $\mu\text{M}$   $\text{Pb}^{2+}$ , (i) h + 15  $\mu\text{M}$   $\text{Fe}^{2+}$ , (j) i + 15  $\mu\text{M}$   $\text{Cd}^{2+}$ , (k) j + 15  $\mu\text{M}$   $\text{Zn}^{2+}$ , (l) k + 15  $\mu\text{M}$   $\text{Co}^{2+}$  (m) l + 15  $\mu\text{M}$   $\text{Mn}^{2+}$ , (n) m + 10  $\mu\text{M}$   $\text{Cr}^{3+}$ , (o) m + 20  $\mu\text{M}$   $\text{Cr}^{3+}$ , (p) m + 25  $\mu\text{M}$   $\text{Cr}^{3+}$ , (q) m + 35  $\mu\text{M}$   $\text{Cr}^{3+}$ , (r) m + 45  $\mu\text{M}$   $\text{Cr}^{3+}$ , (s) m + 50  $\mu\text{M}$   $\text{Cr}^{3+}$ , (t) m + 62.5  $\mu\text{M}$   $\text{Cr}^{3+}$ , (u) m + 75  $\mu\text{M}$   $\text{Cr}^{3+}$ , (v) m + 100  $\mu\text{M}$   $\text{Cr}^{3+}$ , (w) m + 150  $\mu\text{M}$   $\text{Cr}^{3+}$ , (x) m + 200  $\mu\text{M}$   $\text{Cr}^{3+}$ , (y) m + 250  $\mu\text{M}$   $\text{Cr}^{3+}$ , (z) m + 375  $\mu\text{M}$   $\text{Cr}^{3+}$ , (a $\square$ ) m + 500  $\mu\text{M}$   $\text{Cr}^{3+}$  and (b $\square$ ) m + 750  $\mu\text{M}$   $\text{Cr}^{3+}$ .

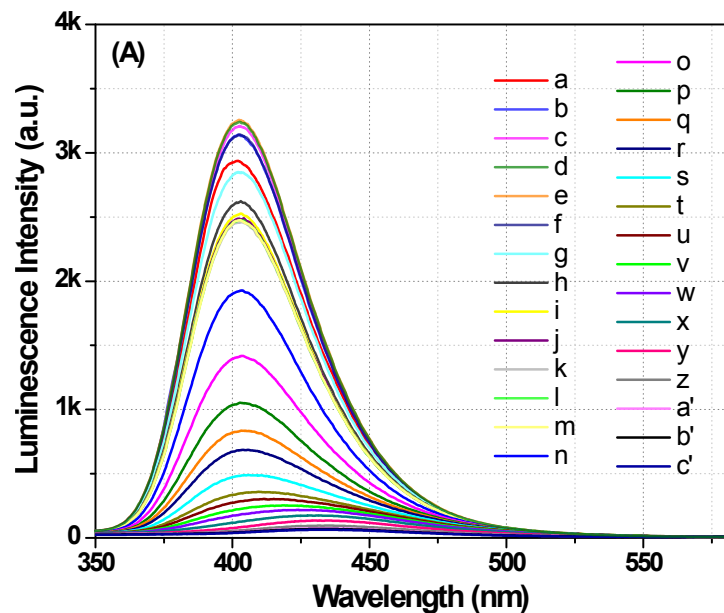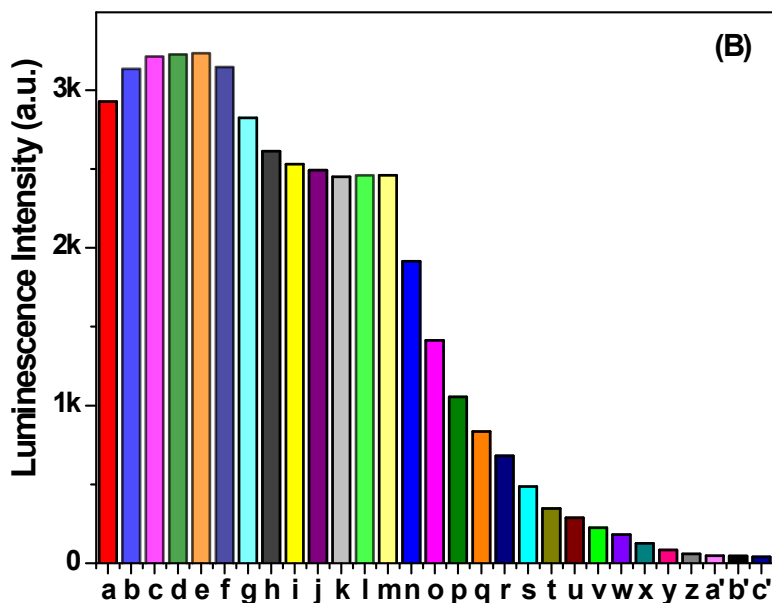

**Fig. S29** (A) Emission spectra of **1** dispersed in aqueous solution upon the cumulative addition of different metal ions followed by stepwise addition of  $\text{Fe}^{3+}$  ion ( $\lambda_{\text{ex}} = 300$  nm). (B) Bar diagram showing the luminescence intensity (monitored at 403 nm) after the sequential addition of the other metal ions and  $\text{Fe}^{3+}$  ion. The composition and concentration of the system were as follows: (a) **1** in aqueous solution, (b) a + 15  $\mu\text{M}$   $\text{Mg}^{2+}$ , (c) b + 15  $\mu\text{M}$   $\text{K}^+$ , (d) c + 15  $\mu\text{M}$   $\text{Ni}^{2+}$ , (e) d + 15  $\mu\text{M}$   $\text{Na}^+$ , (f) e + 15  $\mu\text{M}$   $\text{Cu}^{2+}$ , (g) f + 15  $\mu\text{M}$   $\text{Hg}^{2+}$ , (h) g + 15  $\mu\text{M}$   $\text{Pb}^{2+}$ , (i) h + 15  $\mu\text{M}$   $\text{Fe}^{2+}$ , (j) i + 15  $\mu\text{M}$   $\text{Cd}^{2+}$ , (k) j + 15  $\mu\text{M}$   $\text{Zn}^{2+}$ , (l) k + 15  $\mu\text{M}$   $\text{Co}^{2+}$  (m) l + 15  $\mu\text{M}$   $\text{Mn}^{2+}$ , (n) m + 5  $\mu\text{M}$   $\text{Fe}^{3+}$ , (o) m + 10  $\mu\text{M}$   $\text{Fe}^{3+}$ , (p) m + 15  $\mu\text{M}$   $\text{Fe}^{3+}$ , (q) m + 20  $\mu\text{M}$   $\text{Fe}^{3+}$ , (r) m + 25  $\mu\text{M}$   $\text{Fe}^{3+}$ , (s) m + 35  $\mu\text{M}$   $\text{Fe}^{3+}$ , (t) m + 45  $\mu\text{M}$   $\text{Fe}^{3+}$ , (u) m + 50  $\mu\text{M}$   $\text{Fe}^{3+}$ , (v) m + 62.5  $\mu\text{M}$   $\text{Fe}^{3+}$ , (w) m + 75  $\mu\text{M}$   $\text{Fe}^{3+}$ , (x) m + 100  $\mu\text{M}$   $\text{Fe}^{3+}$ , (y) m + 150  $\mu\text{M}$   $\text{Fe}^{3+}$ , (z) m + 200  $\mu\text{M}$   $\text{Fe}^{3+}$ , (a $\square$ ) m + 250  $\mu\text{M}$   $\text{Fe}^{3+}$ , (b $\square$ ) m + 500  $\mu\text{M}$   $\text{Fe}^{3+}$  and (c $\square$ ) m + 750  $\mu\text{M}$   $\text{Fe}^{3+}$ .



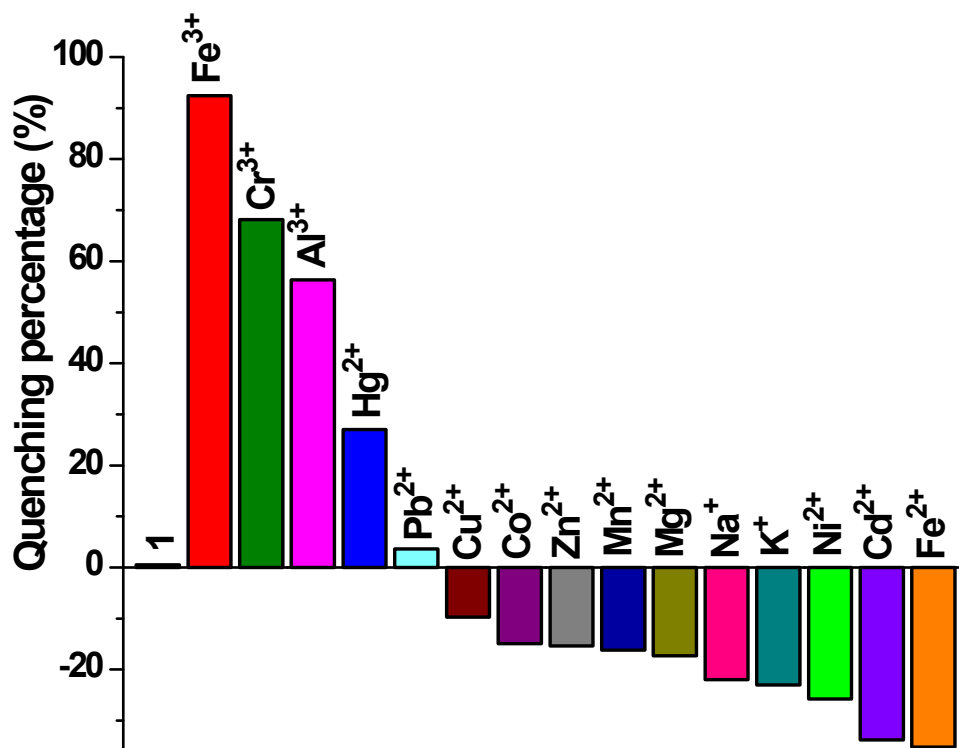

Fig. S30 Quenching percentage (monitored at 403 nm) with respect to the emission of an aqueous suspension of **1** after the addition of 75  $\mu$ M of different metal ions.

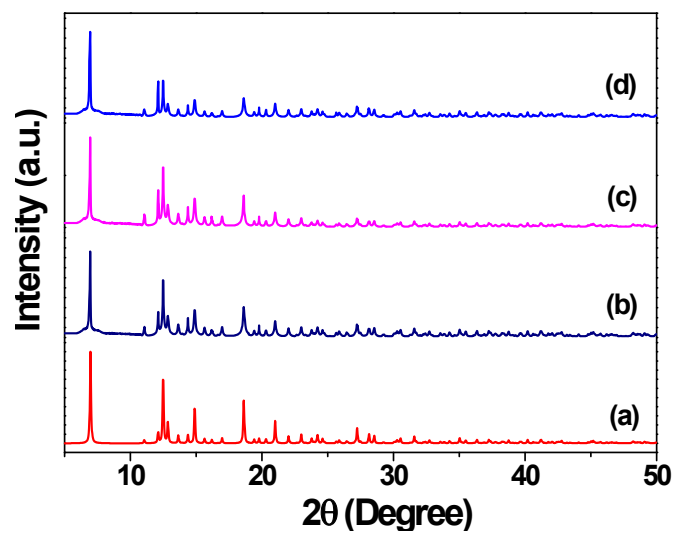

**Fig. S31** The PXRD pattern of **1**: (a) simulated from single-crystal X-ray data, (b) immersed in an aqueous solution of  $\text{Al}^{3+}$ , (c) immersed in an aqueous solution of  $\text{Cr}^{3+}$  and (d) immersed in an aqueous solution of  $\text{Fe}^{3+}$ .

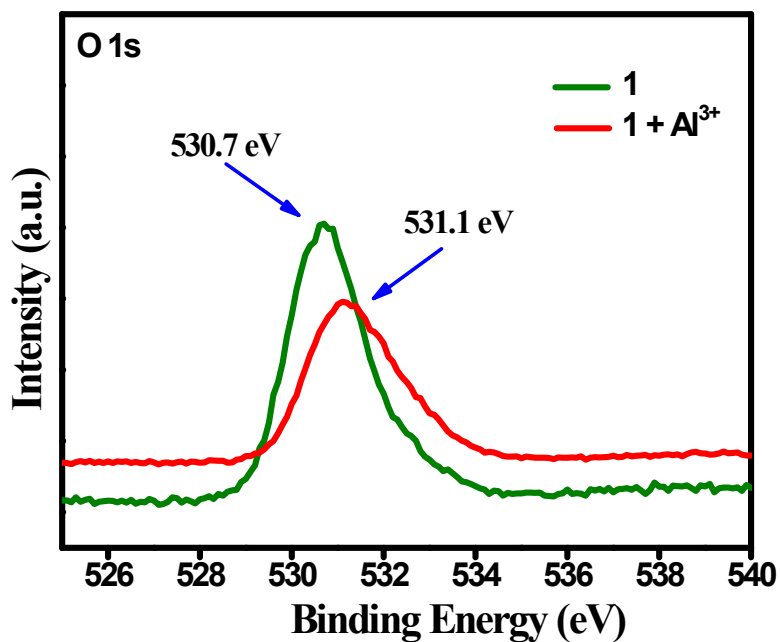

**Fig. S32** O 1s XPS spectra of **1** before and after the addition of Al<sup>3+</sup>.

XPS measurements were performed before and after the addition of Al<sup>3+</sup>. The XPS method revealed that the O 1s from the oxygen atom at 530.7 eV attributed to the carboxylate group in the aromatic ring in **1** is shifted to 531.1 eV in the presence of Al<sup>3+</sup>. This shift and higher binding energy of the O 1s of **1** immersed in Al<sup>3+</sup> compared to **1** clearly confirms that there exists a strong coordination environment between the oxygen atom of the carboxylate group and the Al<sup>3+</sup> ion.

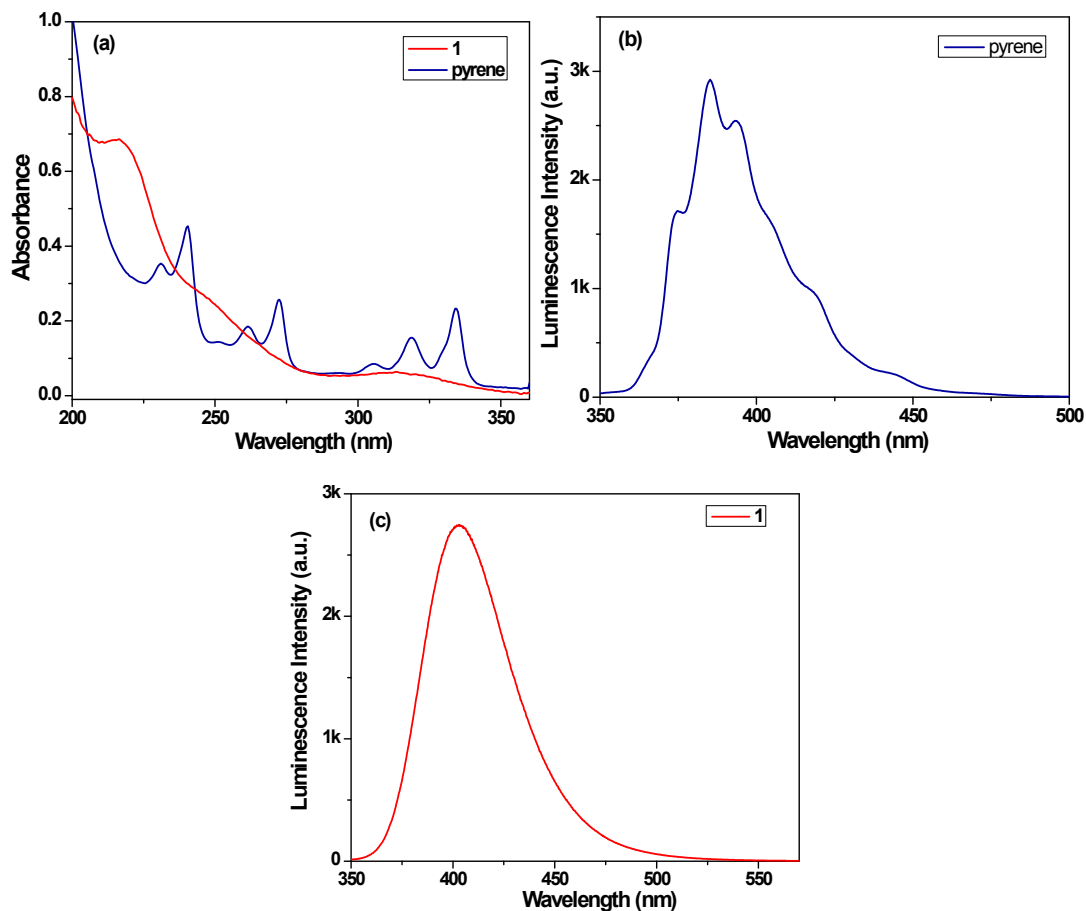

**Fig. S33** (a) Absorption spectra of **1** in an aqueous suspension and pyrene in heptane, (b) luminescence spectra of pyrene upon excitation at 300 nm, and (c) luminescence spectra of **1** upon excitation at 300 nm.

**Determination of quantum yield:**

where  $Q_f^i$  and  $Q_f^s$  are the fluorescence QYs of the sample and that of the standard, respectively;  $F^i$  and  $F^s$  are the integrated intensities (areas) of sample and standard spectra, respectively;  $f_s$  and  $f_i$  are the absorbance factor of standard and sample, respectively; the refractive indices of the sample and reference solution are  $n_i$  and  $n_s$ , respectively.

$$\phi_f^i = \frac{152712 \times 0.0629 \times 1.33^2}{108303 \times 0.0544 \times 1.38^2} \times 0.3$$

$$\phi_f^i = 0.45$$
